# Supplementary material for: Improved breakdown strength and energy storage density of a Ce doped strontium titanate core by silica shell coating
Source: Royal Society of Chemistry journal article supplement (doi:10.1039/c8tc03181a), 2018-01-01
Supplement: c8tc03181a1.pdf [file c8tc03181a1.pdf]

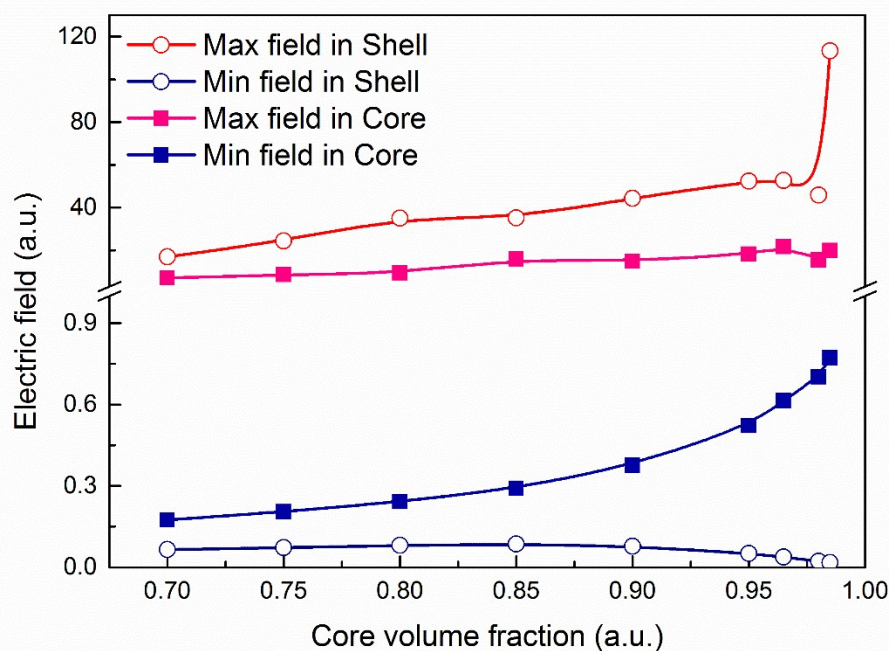

Fig. S1 Maximum and minimum electric for the core and shell material.

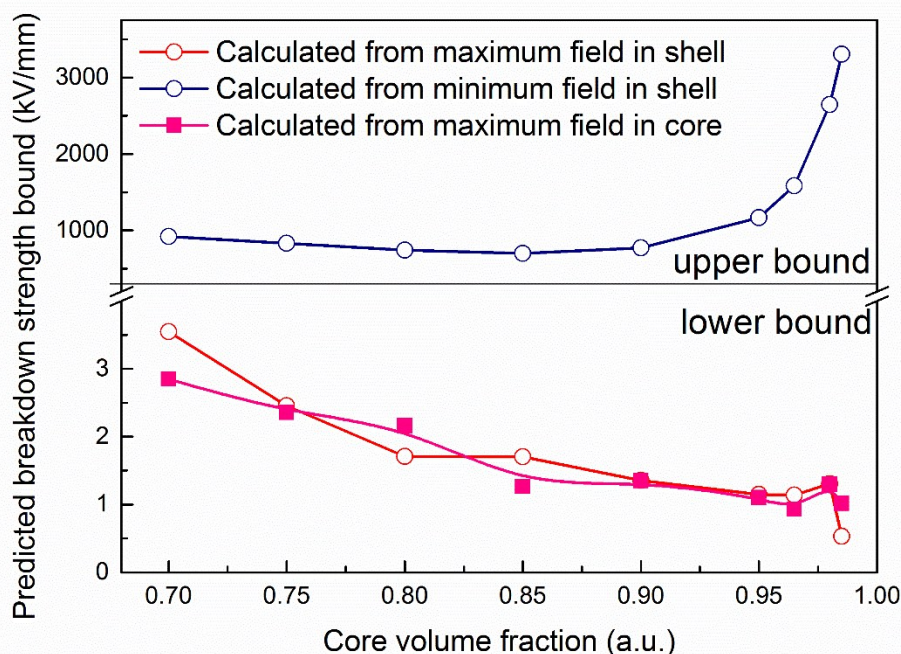

Fig. S2 Predicted bounds for the composite breakdown strength based upon the maximum and minimum electric field strength respectively found in the core and shell material.
